# Supplementary material for: Rapid electrochemical recognition of trimethoprim in human urine samples using new modified electrodes (CPE/Ag/Au NPs) analysing tunable electrode properties: experimental and theoretical studies
Source: Royal Society of Chemistry journal article supplement (doi:10.1039/d1an01408k), 2021-01-01
Supplement: d1an01408k1.pdf [file d1an01408k1.pdf]

**Rapid electrochemical recognition of trimethoprim in urine sample  
using new modified electrode (CPE/Ag/AuNPs) analyzing tunable  
electrode properties: Experimental and theoretical studies**

**Supplementary materials**



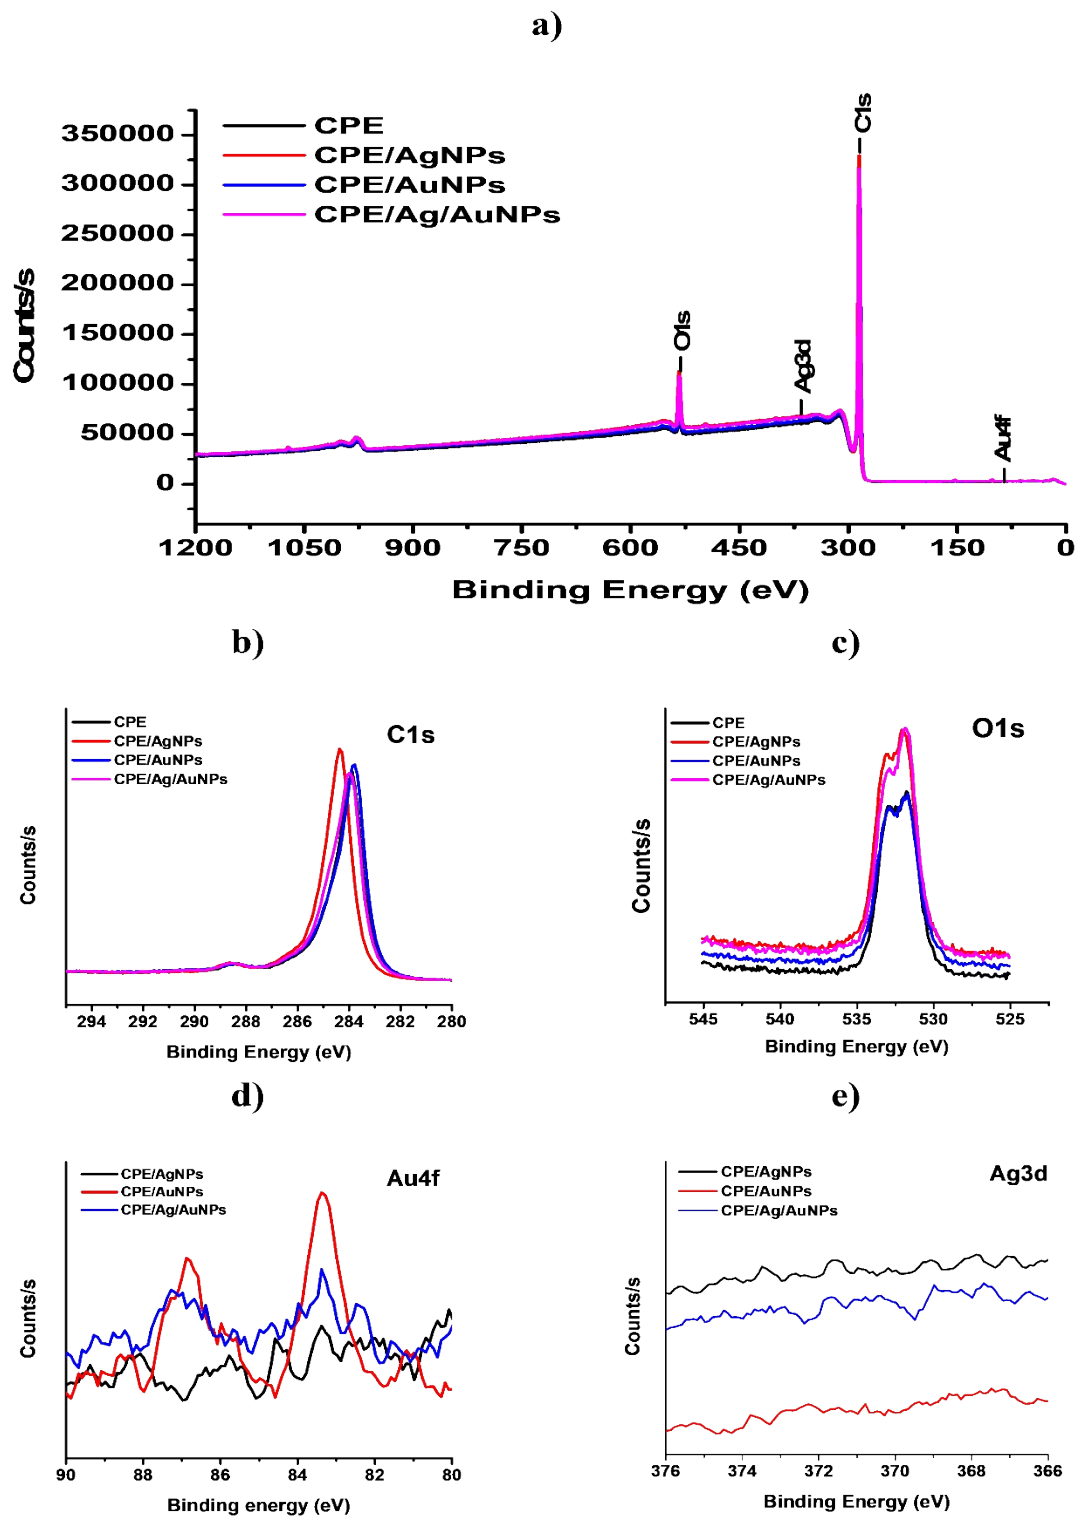

Figure S2. XPS studies for the different modified carbon pastes.

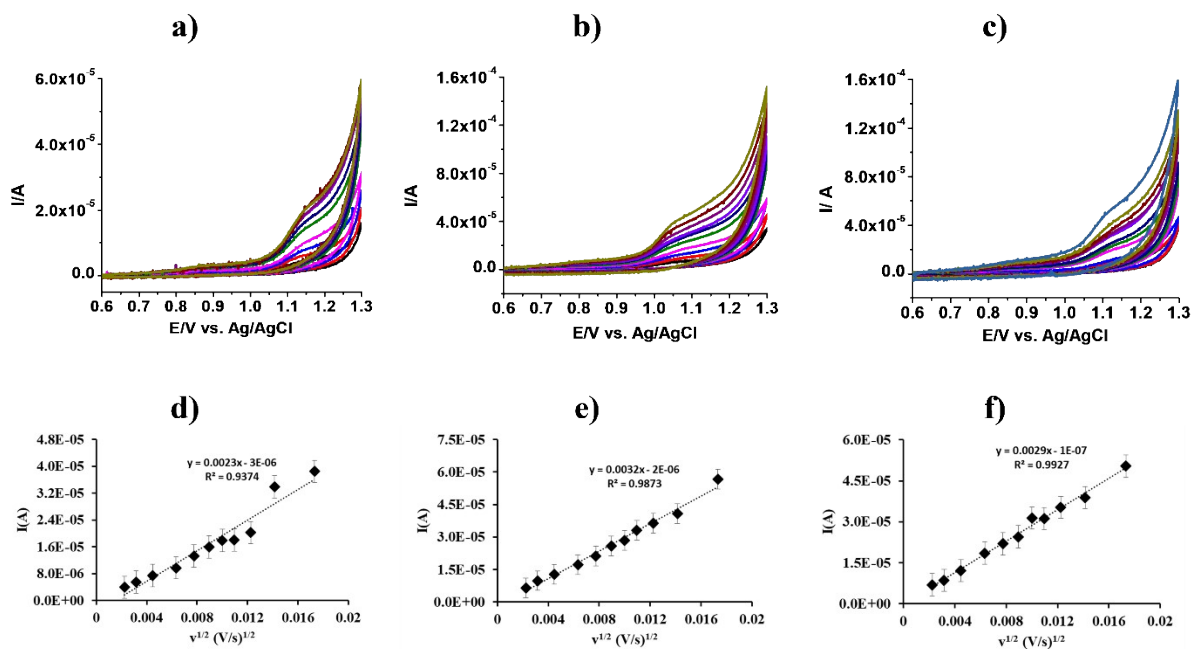

**Figure S3.** Dependence of the cyclic voltammetric response at **a and d)** CPE; **b and e)** CPE/AgNPs; **c and f)** CPE/AuNPs on sweep rate in 100  $\mu\text{mol/L}$  TMP in B-R buffer solution (pH 7.0, 0.2 mol/L). Scan rates from bottom to top: 5, 10, 20, 40, 60, 80, 100, 150, 200, 300 mV/s.

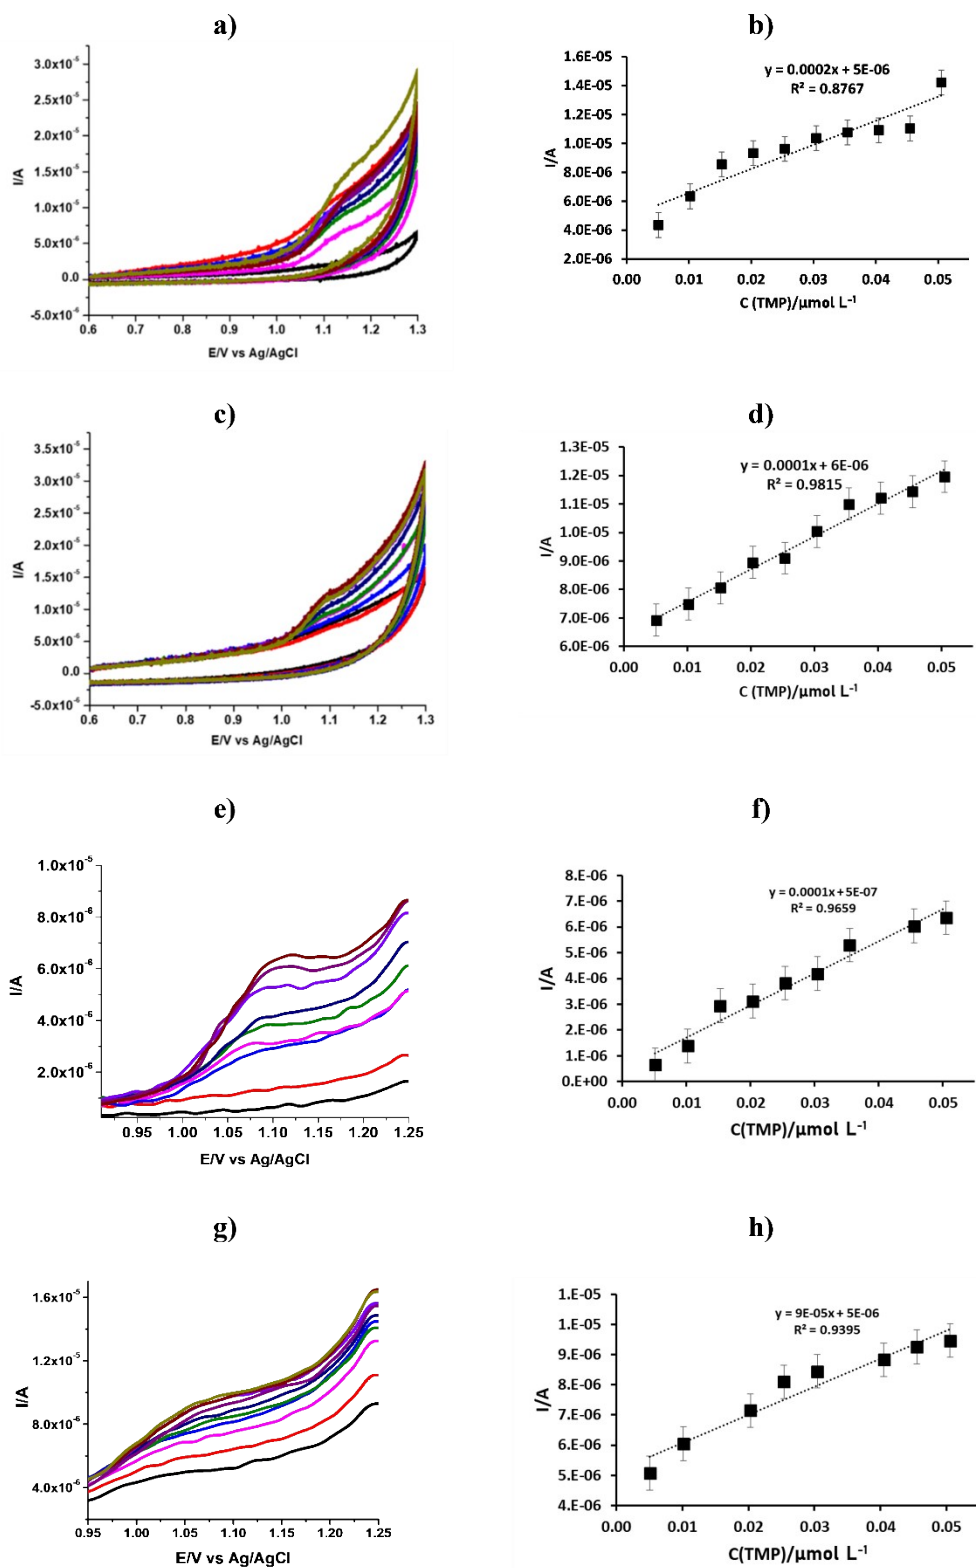

**Figure S4. a and b)** The CV detection of TMP at CPE/AgNPs, and measured anodic currents at different concentrations (0.005 to 0.05  $\mu mol/L$ ) in B-R buffer solution (pH 7.0, 0.2 mol/L) at scan rate of 50 mV/s; **c and d)** The CV detection of TMP at CPE/AuNPs, and measured anodic currents

at different concentrations (0.005 to 0.05  $\mu\text{mol/L}$ ) in B-R buffer solution at scan rate of 50 mV/s; **e and f** the DPV detection of TMP at CPE/AgNPs with the different concentration (0.005–0.05  $\mu\text{mol/L}$ ); **e and f** the DPV detection of TMP at CPE/AuNPs with the different concentration (0.005–0.05  $\mu\text{mol/L}$ ).

**The regression equations applied for TMP is as described below: CV at different scan rates**

$$\text{CPE: } I_{\text{ap}} (\text{A}) = 0.0023 v (\text{V/s}) + 3.0 \times 10^{-6}$$

$$\text{CPE/Ag NPs: } I_{\text{ap}} (\text{A}) = 0.0032 v (\text{V/s}) + 2.0 \times 10^{-6}$$

$$\text{CPE/Au NPs: } I_{\text{ap}} (\text{A}) = 0.0029 v (\text{V/s}) + 1.0 \times 10^{-7}$$

$$\text{CPE/Ag/Au NPs: } I_{\text{ap}} (\text{A}) = 0.0031 v (\text{V/s}) + 8.0 \times 10^{-7}$$

**CV at different concentration of TMP:**

$$\text{CPE/AgNPs: } I_{\text{pa}} (\text{A}) = (2 \times 10^{-4} C_{\text{TMP}} (\mu\text{mol/L}) + 5 \times 10^{-6}); \text{ correlation coefficient: } 0.951$$

$$\text{CPE/AuNPs: } I_{\text{pa}} (\text{A}) = (1 \times 10^{-4} C_{\text{TMP}} (\mu\text{mol/L}) + 6 \times 10^{-6}); \text{ correlation coefficient: } 0.991$$

$$\text{CPE/Ag/AuNPs: } I_{\text{pa}} (\text{A}) = (3 \times 10^{-4} C_{\text{TMP}} (\mu\text{mol/L}) + 8 \times 10^{-7}); \text{ correlation coefficient: } 0.963$$

**DPV at different concentration of TMP:**

$$\text{CPE/AgNPs: } I_{\text{pa}} (\text{A}) = (1 \times 10^{-3} C_{\text{TMP}} (\mu\text{mol/L}) + 5 \times 10^{-7}); \text{ correlation coefficient: } 0.971$$

$$\text{CPE/Au NPs: } I_{\text{pa}} (\text{A}) = (9 \times 10^{-5} C_{\text{TMP}} (\mu\text{mol/L}) + 5 \times 10^{-6}); \text{ correlation coefficient: } 0.945$$

$$\text{CPE/Ag/AuNPs: } I_{\text{pa}} (\text{A}) = (5.0 \times 10^{-5} C_{\text{TMP}} (\mu\text{mol/L}) + 1.0 \times 10^{-6}); \text{ correlation coefficient: } 0.960$$

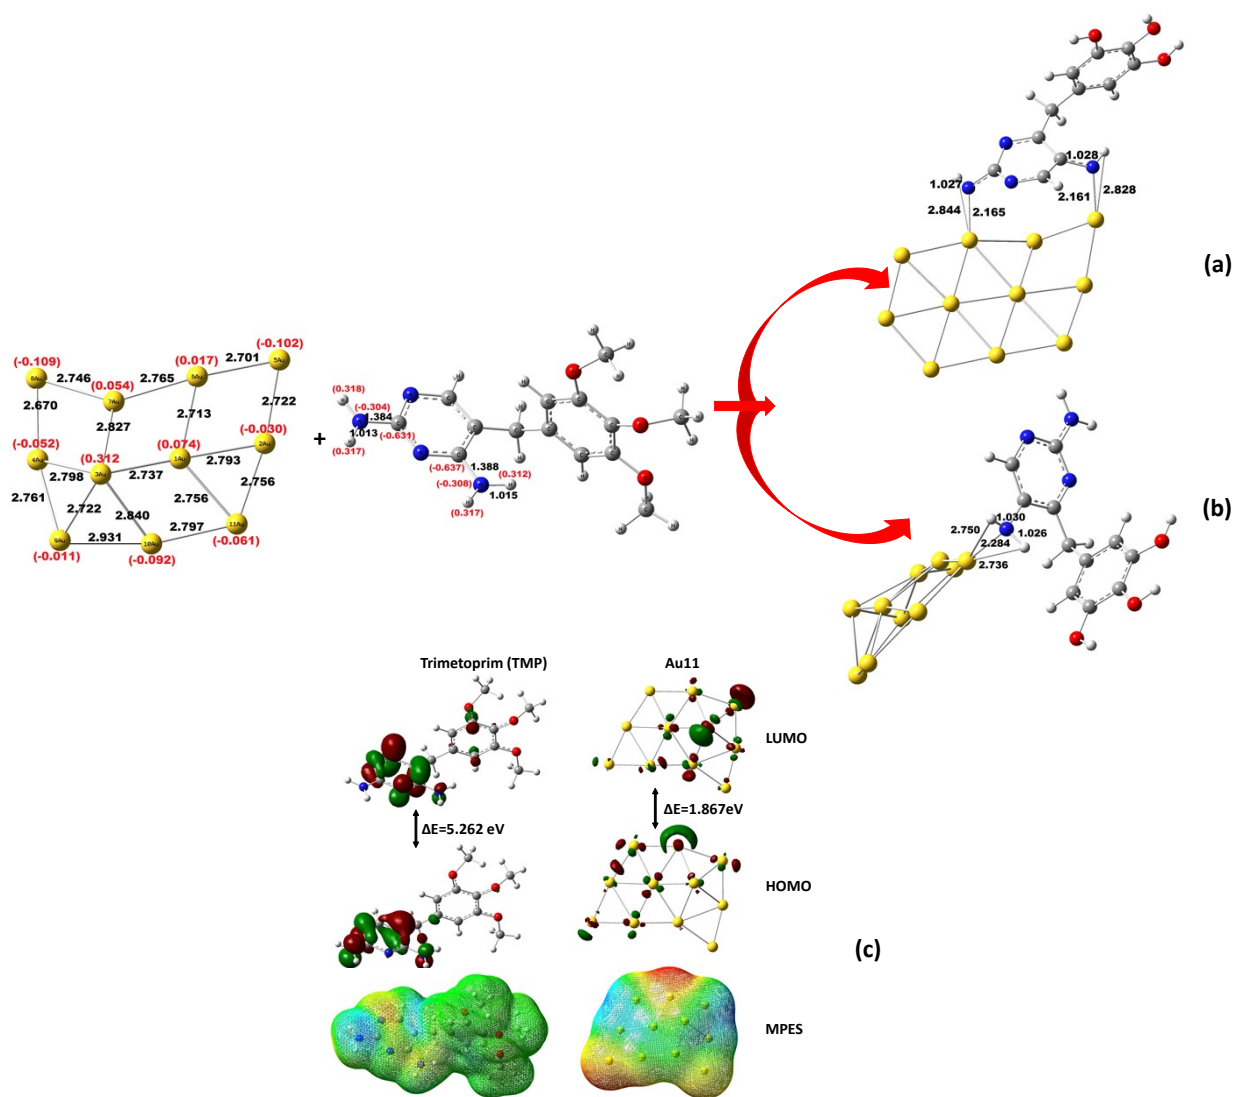

**Figure S5.** The optimization of TMP with Au<sub>11</sub> cluster surface in the different positions at B3LYP/CEP-31G: (a) at the parallel plane surface to Au<sub>11</sub>; (b) in the corner of Au<sub>11</sub> plane; (c) electrostatic map potential of TMP and Au<sub>11</sub>.

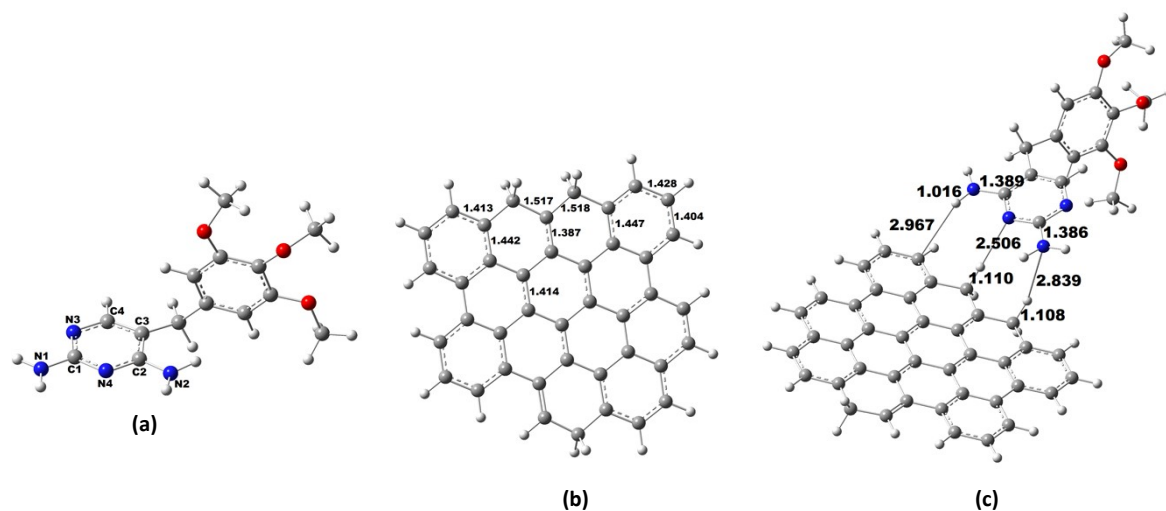

**Figure S6.** Molecular structure: a) Trimethoprim; b) Graphite and c) Trimethoprim plus Graphite

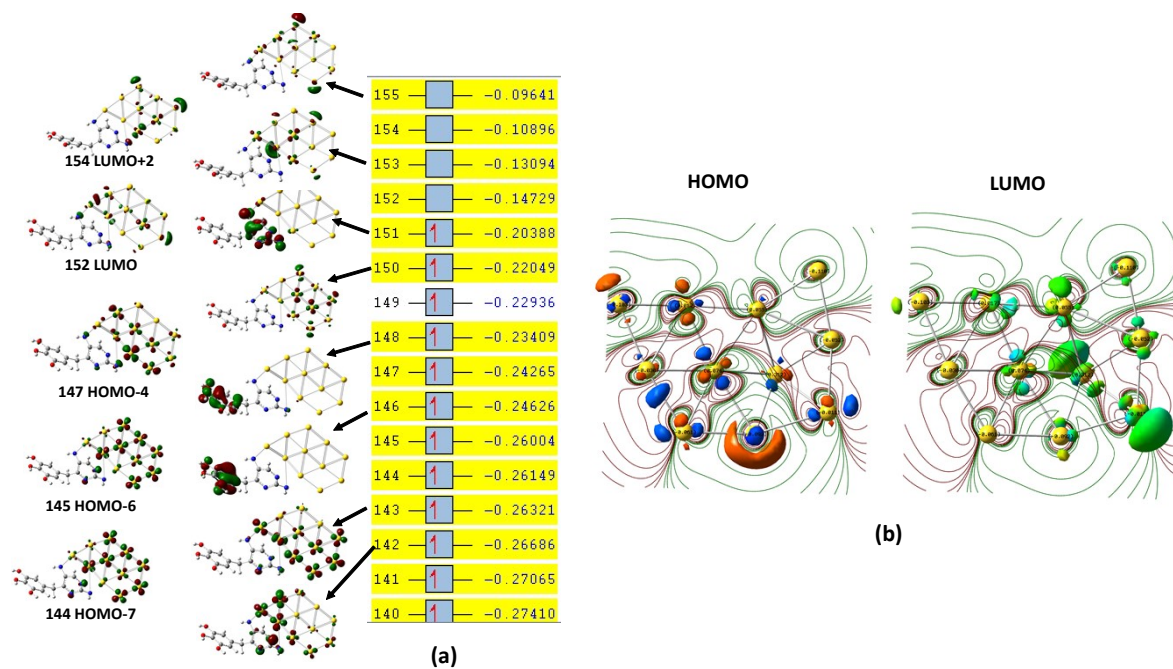

**Figure S7.** a) Natural Transition Orbitals determined with B3LYP/CEP-31G basis set at  $S=0$ , orbital 105 (*particle*), and orbital 106 (*hole*); a) for canonical basis, excited state number 26 at  $S=0$  and b) The electron density isosurface at [Au11] at gaseous state: Color code use for the structure of molecule C(grey), H(white), N(blue), O(red) and Ru (turquoise/green), and (contour  $0.05 \text{ e}/\text{\AA}^3$ ), HOMO and LUMO determined by B3LYP/CEP-31G: HOMO and LUMO contour plots (isosurface value = 0.05 au).



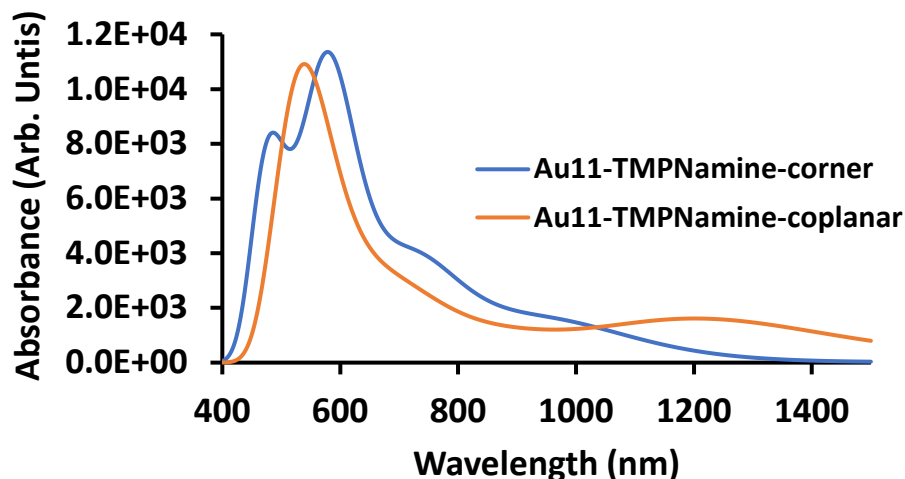

**Figure S8.** TD-DFT spectra of Au11 cluster with trimethoprim: a) Au11-TMP N<sub>amine</sub> corner and b) Au11-TMP Namine coplanar/corner at b3lyp/dgdzvp basis set at gaseous state.

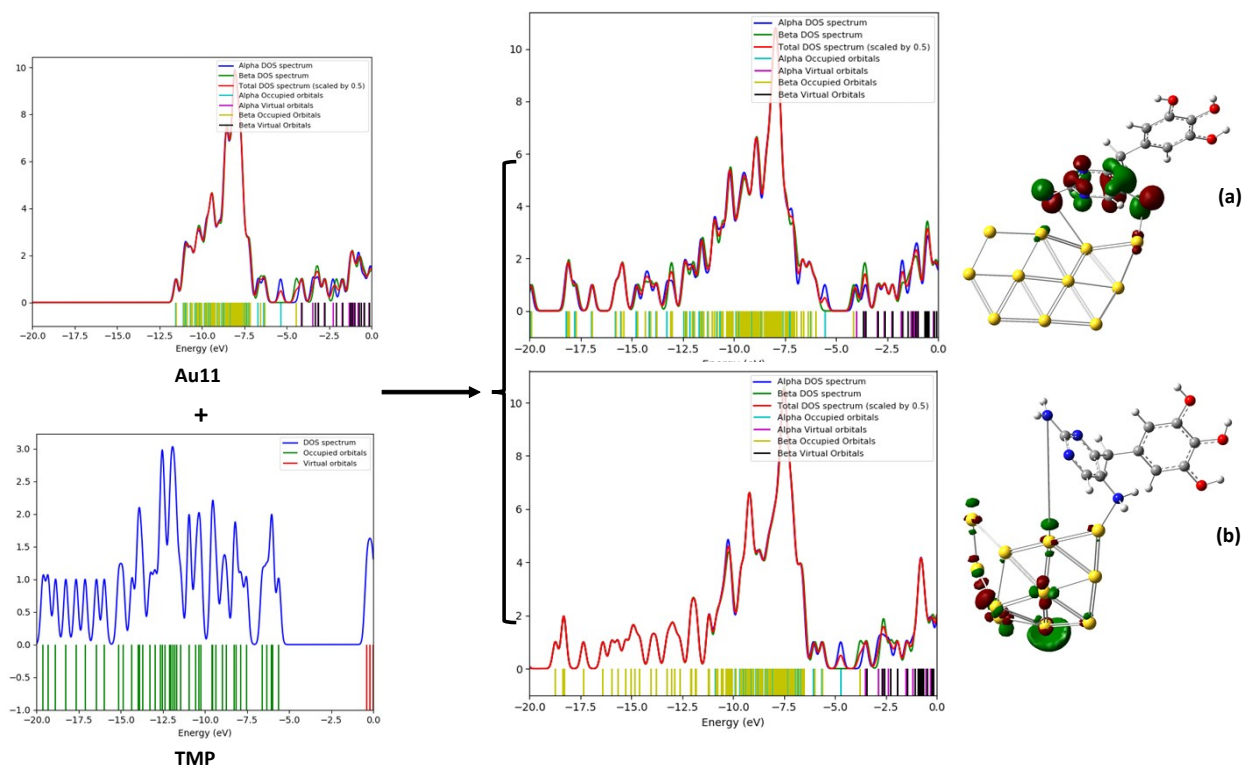

**Figure S9.** Density of state (DOS) and HOMO of [TMP- Au11]: (a) parallel; (b) corner of Au11 plane.

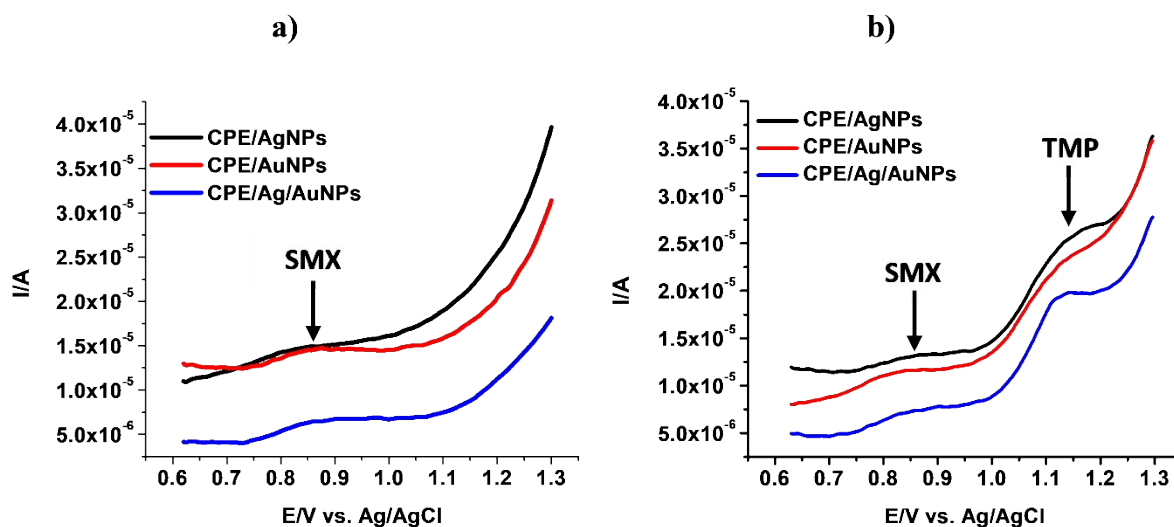

**Figure S10.** DPV profiles obtained from 0.6 to 1.3 V in urine samples a) SMX 100  $\mu\text{M}$  b) SMX and TMP 100  $\mu\text{M}$ .

**Table S1.** Bond lengths ( $\text{\AA}$ ) and bond angles ( $^\circ$ ) resulted in different spin states for  $[\text{Au11-TMP}]$ , using Functional B3LYP/CEP-31G level of theory.

| Bond length ligand ( $L^1$ )  | CEP-31G | Bond length complexes ( $\text{\AA}$ )  | $[\text{Au11-tmp}]$ at the parallel plane surface to Au11 (Secondary $N_{\text{amine}}$ ) | $[\text{Au11-tmp}]$ in the corner of Au11 surface (Primary $N_{\text{amine}}$ ) |
|-------------------------------|---------|-----------------------------------------|-------------------------------------------------------------------------------------------|---------------------------------------------------------------------------------|
| $N1_{\text{amine}}\text{-C1}$ | 1.384   | 6Au-N1                                  | 2.165                                                                                     | -                                                                               |
| $N2_{\text{amine}}\text{-C2}$ | 1.388   | 6Au-HN1                                 | 2.844                                                                                     | -                                                                               |
| $C1\text{-}N3_{\text{amine}}$ | 1.376   | 5Au-N2                                  | 2.161                                                                                     | 2.284                                                                           |
| $C1\text{-}N4_{\text{amine}}$ | 1.372   | 5Au-H <sub>1</sub> N2                   | 2.828                                                                                     | 2.736                                                                           |
| $N3_{\text{amine}}\text{-C4}$ | 1.369   | 5Au-H <sub>2</sub> N2                   | -                                                                                         | 2.750                                                                           |
| $N4_{\text{amine}}\text{-C2}$ | 1.369   | N1-H1                                   | 1.027                                                                                     | 1.026                                                                           |
| $C2\text{-C3}$                | 1.446   | N1-H2                                   | -                                                                                         | 1.030                                                                           |
| $C3\text{-C4}$                | 1.415   | N2-H                                    | 1.028                                                                                     |                                                                                 |
| $N1\text{-H}$                 | 1.013   | N1-C1                                   | 1.346                                                                                     |                                                                                 |
| $N2\text{-H}$                 | 1.015   | N2-C2                                   | 1.375                                                                                     | -                                                                               |
|                               |         | <i>Bond Angle (<math>^\circ</math>)</i> |                                                                                           |                                                                                 |
|                               |         | 6Au-N1-H                                | 121.8                                                                                     |                                                                                 |
|                               |         | 6Nu-N1-C1                               | 117.2                                                                                     |                                                                                 |
|                               |         | 5Au-N2-H <sub>1</sub>                   | 120.8                                                                                     | 105.1                                                                           |
|                               |         | 5Au-N2-H <sub>2</sub>                   | -                                                                                         | 105.9                                                                           |
|                               |         | 5Au-N2-C2                               | 107.8                                                                                     | 112.7                                                                           |

**Table S2.** Mulliken charges of  $L^1$  and its complexes with:  $[\text{Au11-TMP}]$ . Functional B3LYP/CEP-31G basis set

| $L^1$ |  | Atoms | Au11-cluster | $[\text{Au11-tmp}]$ at the parallel plane surface to Au11 (Secondary $N_{\text{amine}}$ ) | $[\text{Au11-tmp}]$ in the corner of Au11 surface (Primary |
|-------|--|-------|--------------|-------------------------------------------------------------------------------------------|------------------------------------------------------------|
|       |  |       |              |                                                                                           |                                                            |

|           |        |       |        |        |                      |
|-----------|--------|-------|--------|--------|----------------------|
|           |        |       |        |        | N <sub>amine</sub> ) |
| <b>N1</b> | -0.330 | 1-Au  | 0.074  | 0.180  | 0.074                |
| <b>N2</b> | -0.320 | 2-Au  | -0.030 | -0.028 | -0.102               |
| <b>N3</b> | 0.258  | 3-Au  | 0.312  | 0.199  | 0.274                |
| <b>N4</b> | 0.221  | 4-Au  | -0.052 | -0.108 | -0.080               |
| <b>C1</b> | -0.689 | 5-Au  | -0.103 | 0.008  | -0.051               |
| <b>C2</b> | -0.740 | 6-Au  | 0.017  | 0.151  | -0.049               |
| <b>C3</b> | 0.598  | 7-Au  | 0.055  | -0.078 | -0.124               |
| <b>C4</b> | -0.820 | 8-Au  | 0.110  | -0.118 | -0.026               |
|           |        | 9-Au  | -0.011 | -0.002 | -0.138               |
|           |        | 10-Au | -0.092 | -0.111 | -0.046               |
|           |        | 11-Au |        | 0.135  | 0.055                |
| H1        | 0.276  | H1    |        | 0.305  | 0.328                |
| H2        | 0.275  | H4    |        | 0.283  | 0.326                |
| H3        | 0.271  | N1    |        | -0.208 | -0.287               |
| H4        | 0.292  | N2    |        | -0.209 | -0.486               |
|           |        | N3    |        | 0.316  | 0.328                |
|           |        | N4    |        | 0.420  | 0.396                |
|           |        | C1    |        | -0.597 | -0.563               |
|           |        | C2    |        | -0.031 | 0.386                |
|           |        | C3    |        | -0.534 | -0.643               |
|           |        | C4    |        | -0.489 | -0.711               |

**Table S3.** Electronic properties of the ligands (TMP and C graphite) and Au cluster.

| Compounds                                                                        | Functional: B3LYP/CEP-31g |           |           |         |                  |                  |
|----------------------------------------------------------------------------------|---------------------------|-----------|-----------|---------|------------------|------------------|
|                                                                                  | E <sub>HF</sub>           | HOMO (eV) | LUMO (eV) | ΔE (eV) | Hardness (η, eV) | Softness (σ, eV) |
| L <sup>1</sup>                                                                   | -1310.624                 | -6.284    | -1.136    | 5.148   | 2.574            | 0.388            |
| TMP                                                                              | -177.149                  | -5.659    | -0.397    | 5.262   | 2.631            | 0.380            |
| Graphite                                                                         | -243.328                  | -4.481    | -2.191    | 2.290   | 1.145            | 0.873            |
| Au11                                                                             | -1497.563                 | -6.333    | -4.466    | 1.867   | 0.933            | 0.1071           |
| [Au11-tmp] at the parallel plane surface to Au11 (Secondary N <sub>amine</sub> ) | -1652.982                 | -6.015    | -4.159    | 1.855   | 0.928            | 1.078            |
| [Au11-tmp] in the corner                                                         | -1654.238                 | -5.640    | -3.784    | 1.856   | 0.928            | 1.077            |

|                                               |  |  |  |  |  |  |
|-----------------------------------------------|--|--|--|--|--|--|
| of Au11 surface (Primary N <sub>amine</sub> ) |  |  |  |  |  |  |
|-----------------------------------------------|--|--|--|--|--|--|

**Table S4.** TD-DFT spectral data of electronic transitions of Au cluster with TMP at the plane with oscillator strength  $f > 0.0001$ .

| Wavelength (nm) | Osc. Strength (f) | [Au11-tmp] in the corner of Au11 surface (Primary N <sub>amine</sub> )                                                             | Character | Theory (nm) |
|-----------------|-------------------|------------------------------------------------------------------------------------------------------------------------------------|-----------|-------------|
| 2357.1          | 0.0006            | HOMO->LUMO (99%)                                                                                                                   | CT        |             |
| 1108.7          | 0.0001            | HOMO->LUMO (96%)<br>HOMO->LUMO+1 (2%)<br>HOMO->LUMO+1 (56%)<br>HOMO->LUMO+1 (26%)                                                  | CT        |             |
| 977.7           | 0.012             | HOMO-1->LUMO (8%)<br>HOMO->LUMO (3%)<br>HOMO-1->LUMO (2%)                                                                          | CT        |             |
| 976.0           | 0.0057            | HOMO-1->LUMO (43%)<br>HOMO->LUMO+1 (30%)<br>HOMO->LUMO+1 (23%)<br>HOMO-1->LUMO (2%)                                                | CT        |             |
| 870.6           | 0.0012            | HOMO->LUMO+2 (97%)                                                                                                                 | CT        | 271         |
| 815.6           | 0.0052            | HOMO-1->LUMO (90%)<br>HOMO-1->LUMO (2%)<br>HOMO->LUMO+1 (2%)<br>HOMO-1->LUMO (23%)<br>HOMO->LUMO+3 (33%)                           | CT        |             |
| 761.3           | 0.0179            | HOMO-1->LUMO+1 (11%)<br>HOMO->LUMO+1 (25%)<br>HOMO-1->LUMO (2%)<br>HOMO-2->LUMO (54%)                                              | CT        |             |
| 721.8           | 0.0085            | HOMO-1->LUMO+1 (29%)<br>HOMO-1->LUMO (8%)<br>HOMO->LUMO+1 (3%)<br>HOMO->LUMO+3 (55%)<br>HOMO-1->LUMO+1 (13%)<br>HOMO->LUMO+1 (11%) | CT        |             |
| 709.0           | 0.0237            | HOMO-2->LUMO (7%)<br>HOMO-1->LUMO (5%)<br>HOMO-6->LUMO (2%)<br>HOMO-4->LUMO (2%)                                                   | CT        |             |
| 636.9           | 0.0072            | HOMO-2->LUMO (50%)<br>HOMO-3->LUMO (17%)<br>HOMO-1->LUMO+1 (12%)<br>HOMO-2->LUMO (11%)                                             | CT        |             |
| 609.8           | 0.0005            | HOMO-1->LUMO+1 (63%)<br>HOMO->LUMO+2 (17%)<br>HOMO-6->LUMO (6%)<br>HOMO->LUMO+3 (3%)                                               | CT        |             |
| 598.1           | 0.0131            | HOMO-4->LUMO (25%)<br>HOMO-5->LUMO (24%)                                                                                           | CT        | 251         |

---

|       |        |                                                                                                                                                                                                                                                                                                                                                                                                                                                                                                                                                                                                                                                                                                                                                                                         |
|-------|--------|-----------------------------------------------------------------------------------------------------------------------------------------------------------------------------------------------------------------------------------------------------------------------------------------------------------------------------------------------------------------------------------------------------------------------------------------------------------------------------------------------------------------------------------------------------------------------------------------------------------------------------------------------------------------------------------------------------------------------------------------------------------------------------------------|
|       |        | HOMO-3->LUMO (17%)<br>HOMO-1->LUMO+1 (8%)<br>HOMO-2->LUMO (6%)<br>HOMO-2->LUMO+1 (4%)                                                                                                                                                                                                                                                                                                                                                                                                                                                                                                                                                                                                                                                                                                   |
| 584.7 | 0.0729 | HOMO-5->LUMO (32%)<br>HOMO-1->LUMO+1 (15%)<br>HOMO-2->LUMO (12%)<br>HOMO-2->LUMO (6%)<br>HOMO-1->LUMO+1 (5%)<br>HOMO-6->LUMO (4%)<br>HOMO-4->LUMO (3%)<br>HOMO-1->LUMO (2%)<br>HOMO-3->LUMO (2%)<br>HOMO->LUMO+1 (2%)<br>HOMO->LUMO+2 (2%)<br>HOMO->LUMO+3 (2%)<br>HOMO-6->LUMO (17%)<br>HOMO->LUMO+3 (17%)<br>HOMO-1->LUMO+2 (9%)<br>HOMO-7->LUMO (9%)<br>HOMO-5->LUMO (7%)<br>HOMO-4->LUMO (6%)<br>HOMO-2->LUMO (5%)<br>HOMO-2->LUMO+1 (4%)<br>HOMO-2->LUMO (3%)<br>HOMO-3->LUMO (3%)<br>HOMO->LUMO+3 (2%)<br>HOMO-1->LUMO+1 (2%)<br>HOMO-1->LUMO+2 (2%)<br>HOMO-1->LUMO+2 (27%)<br>HOMO-4->LUMO (16%)<br>HOMO->LUMO+3 (14%)<br>HOMO-2->LUMO+1 (9%)<br>HOMO-1->LUMO+1 (6%)<br>HOMO-5->LUMO (5%)<br>HOMO-3->LUMO+1 (4%)<br>HOMO-2->LUMO (3%)<br>HOMO-6->LUMO (3%)<br>HOMO-7->LUMO (2%) |
| 577.4 | 0.0324 | HOMO-2->LUMO+1 (31%)<br>HOMO-4->LUMO (20%)<br>HOMO-1->LUMO+2 (10%)<br>HOMO->LUMO+3 (10%)<br>HOMO-2->LUMO (5%)<br>HOMO-3->LUMO+1 (3%)<br>HOMO->LUMO+2 (3%)<br>HOMO-3->LUMO (2%)<br>HOMO-4->LUMO (2%)                                                                                                                                                                                                                                                                                                                                                                                                                                                                                                                                                                                     |
| 572.6 | 0.0133 | HOMO-7->LUMO (62%)<br>HOMO-5->LUMO (7%)<br>HOMO-2->LUMO+1 (4%)<br>HOMO-9->LUMO (3%)<br>HOMO-2->LUMO+1 (2%)                                                                                                                                                                                                                                                                                                                                                                                                                                                                                                                                                                                                                                                                              |
| 557.8 | 0.0087 |                                                                                                                                                                                                                                                                                                                                                                                                                                                                                                                                                                                                                                                                                                                                                                                         |
| 548.8 | 0.008  |                                                                                                                                                                                                                                                                                                                                                                                                                                                                                                                                                                                                                                                                                                                                                                                         |

---

---

|       |        |                      |
|-------|--------|----------------------|
|       |        | HOMO->LUMO+3 (2%)    |
|       |        | HOMO->LUMO+2 (52%)   |
|       |        | HOMO-1->LUMO+1 (19%) |
|       |        | HOMO-2->LUMO+1 (3%)  |
|       |        | HOMO-1->LUMO+2 (3%)  |
| 544.7 | 0.0039 | HOMO-10->LUMO (3%)   |
|       |        | HOMO-5->LUMO (3%)    |
|       |        | HOMO-9->LUMO (2%)    |
|       |        | HOMO-7->LUMO (2%)    |
|       |        | HOMO-6->LUMO (2%)    |
|       |        | HOMO->LUMO+3 (2%)    |
|       |        | HOMO-4->LUMO+1 (16%) |
|       |        | HOMO-4->LUMO (12%)   |
|       |        | HOMO-7->LUMO (11%)   |
|       |        | HOMO-5->LUMO (9%)    |
|       |        | HOMO-5->LUMO+1 (7%)  |
| 534.2 | 0.0007 | HOMO-3->LUMO+1 (6%)  |
|       |        | HOMO-2->LUMO+1 (6%)  |
|       |        | HOMO-9->LUMO (6%)    |
|       |        | HOMO-6->LUMO (3%)    |
|       |        | HOMO-6->LUMO+1 (3%)  |
|       |        | HOMO-6->LUMO (2%)    |
|       |        | HOMO-2->LUMO+1 (2%)  |
|       |        | HOMO-1->LUMO+2 (2%)  |
|       |        | HOMO-4->LUMO (34%)   |
|       |        | HOMO-2->LUMO+1 (16%) |
|       |        | HOMO-3->LUMO+1 (11%) |
|       |        | HOMO-6->LUMO (10%)   |
|       |        | HOMO-5->LUMO+1 (5%)  |
| 527.6 | 0.0014 | HOMO-1->LUMO+2 (4%)  |
|       |        | HOMO-7->LUMO (4%)    |
|       |        | HOMO-4->LUMO+1 (4%)  |
|       |        | HOMO->LUMO+3 (3%)    |
|       |        | HOMO-3->LUMO (2%)    |
|       |        | HOMO-6->LUMO (23%)   |
|       |        | HOMO-5->LUMO+1 (15%) |
|       |        | HOMO-10->LUMO (9%)   |
|       |        | HOMO-6->LUMO (9%)    |
|       |        | HOMO-3->LUMO (6%)    |
|       |        | HOMO-6->LUMO+1 (4%)  |
|       |        | HOMO-2->LUMO+1 (4%)  |
| 526.1 | 0.0004 | HOMO-4->LUMO (3%)    |
|       |        | HOMO->LUMO+2 (3%)    |
|       |        | HOMO->LUMO+3 (3%)    |
|       |        | HOMO-11->LUMO (3%)   |
|       |        | HOMO-9->LUMO (3%)    |
|       |        | HOMO-5->LUMO (3%)    |
|       |        | HOMO-3->LUMO+1 (2%)  |
|       |        | HOMO-6->LUMO (14%)   |
| 519.5 | 0.0013 | HOMO-11->LUMO (11%)  |
|       |        | HOMO-6->LUMO (10%)   |
|       |        | HOMO-5->LUMO+1 (8%)  |

---

|        |        |                                                                                                                                                                                                                                                                           |
|--------|--------|---------------------------------------------------------------------------------------------------------------------------------------------------------------------------------------------------------------------------------------------------------------------------|
|        |        | HOMO-3->LUMO (8%)<br>HOMO-6->LUMO+1 (6%)<br>HOMO->LUMO+2 (6%)<br>HOMO-2->LUMO (5%)<br>HOMO-7->LUMO (3%)<br>HOMO-10->LUMO (3%)<br>HOMO-2->LUMO+1 (2%)<br>HOMO-3->LUMO+1 (2%)<br>HOMO-1->LUMO+2 (2%)                                                                        |
| 513.4  | 0.0006 | HOMO-9->LUMO (25%)<br>HOMO-11->LUMO (16%)<br>HOMO-6->LUMO (6%)<br>HOMO-1->LUMO+3 (8%)<br>HOMO-2->LUMO+1 (5%)<br>HOMO-7->LUMO (4%)<br>HOMO-1->LUMO+2 (4%)<br>HOMO-14->LUMO (3%)<br>HOMO->LUMO+4 (3%)<br>HOMO-13->LUMO (2%)<br>HOMO-10->LUMO (2%)<br>HOMO->LUMO+2 (2%)      |
| 510.9  | 0.0027 | HOMO-9->LUMO (36%)<br>HOMO-2->LUMO+1 (11%)<br>HOMO-11->LUMO (7%)<br>HOMO-10->LUMO (5%)<br>HOMO-1->LUMO+2 (5%)<br>HOMO-7->LUMO (2%)<br>HOMO-6->LUMO+1 (4%)<br>HOMO-4->LUMO+1 (3%)<br>HOMO-5->LUMO (2%)<br>HOMO-13->LUMO (2%)<br>HOMO-7->LUMO+1 (2%)<br>HOMO-3->LUMO+1 (2%) |
| 506.9  | 0.0005 | HOMO(A)->LUMO+4 (97%)<br>HOMO-11->LUMO (31%)<br>HOMO-2->LUMO+1 (11%)<br>HOMO-3->LUMO (8%)<br>HOMO-7->LUMO+1 (6%)<br>HOMO-1->LUMO+2 (6%)<br>HOMO-2->LUMO (5%)                                                                                                              |
| 503.0  | 0.0058 | HOMO-12->LUMO (3%)<br>HOMO-1->LUMO+3 (3%)<br>HOMO-2->LUMO+2 (2%)<br>HOMO-15->LUMO (2%)<br>HOMO-13->LUMO (2%)<br>HOMO-9->LUMO (2%)                                                                                                                                         |
| 1236.9 | 0.0199 | [Au11-tmp] at the parallel plane<br>surface to Au11 (Secondary N <sub>amine</sub> )<br>HOMO->LUMO (95%)                                                                                                                                                                   |
| 1097.7 | 0.0015 | HOMO->LUMO (74%)<br>HOMO-1->LUMO (23%)                                                                                                                                                                                                                                    |

|       |        |                                                                                                                                                                                                 |
|-------|--------|-------------------------------------------------------------------------------------------------------------------------------------------------------------------------------------------------|
| 931.2 | 0.0065 | HOMO-1->LUMO (38%)<br>H-OMO2->LUMO (19%)<br>HOMO-1->LUMO (15%)<br>HOMO->LUMO+1 (14%)<br>HOMO->LUMO (5%)                                                                                         |
| 918.1 | 0008   | HOMO-1->LUMO (46%)<br>HOMO-1->LUMO (22%)<br>HOMO->LUMO (13%)<br>HOMO-2->LUMO (8%)<br>HOMO->LUMO+1 (4%)                                                                                          |
| 880.9 | 0.0045 | HOMO-1->LUMO (10%)<br>HOMO->LUMO+1 (78%)<br>HOMO-1->LUMO (3%)<br>HOMO->LUMO (5%)<br>HOMO-1->LUMO+1 (35%)                                                                                        |
| 773.3 | 0.0006 | HOMO->LUMO+1 (10%)<br>HOMO->LUMO+2 (42%)<br>HOMO-2->LUMO (5%)<br>HOMO-3->LUMO (2%)<br>HOMO-1->LUMO (3%)<br>HOMO-2->LUMO (47%)                                                                   |
| 763.8 | 0.0099 | HOMO-1->LUMO+1 (13%)<br>HOMO-1->LUMO (22%)<br>HOMO-3->LUMO (3%)<br>HOMO-3->LUMO (9%)<br>HOMO-3->LUMO (51%)<br>HOMO-4->LUMO (22%)<br>HOMO-2->LUMO (5%)                                           |
| 738.2 | 0.0058 | HOMO->LUMO+1 (4%)<br>HOMO->LUMO+2 (4%)<br>HOMO-2->LUMO (3%)<br>HOMO-3->LUMO (2%)<br>HOMO-1->LUMO (2%)                                                                                           |
| 713.3 | 0.0016 | HOMO->LUMO+1 (67%)<br>HOMO-5->LUMO (5%)<br>HOMO->LUMO+2 (4%)<br>HOMO-3->LUMO (4%)<br>HOMO-5->LUMO+1 (4%)<br>HOMO-1->LUMO (3%)<br>HOMO-4->LUMO (2%)<br>HOMO-1->LUMO+1 (2%)<br>HOMO-2->LUMO (2%)  |
| 681.8 | 0.0192 | HOMO-2->LUMO (51%)<br>HOMO-4->LUMO (12%)<br>HOMO-1->L+1 (10%)<br>HOMO-2->LUMO+1 (4%)<br>HOMO-6->LUMO (3%)<br>HOMO-5->LUMO (2%)<br>HOMO-4->LUMO (2%)<br>HOMO-3->LUMO+1 (2%)<br>HOMO-1->LUMO (2%) |
| 667.7 | 0.0019 | HOMO-1->LUMO+2 (35%)<br>HOMO-2->LUMO+1 (24%)<br>HOMO-3->LUMO (8%)                                                                                                                               |



---

|       |        |                                                                                                                                                                                                                                                                                                                                                                                                                                    |
|-------|--------|------------------------------------------------------------------------------------------------------------------------------------------------------------------------------------------------------------------------------------------------------------------------------------------------------------------------------------------------------------------------------------------------------------------------------------|
| 656.9 | 0.002  | HOMO-1->LUMO+1 (7%)<br>HOMO-2->LUMO (5%)<br>HOMO-1->LUMO+1 (5%)<br>HOMO-4->LUMO (4%)<br>HOMO-3->LUMO+1 (2%)<br>HOMO->LUMO+2 (2%)<br>HOMO-4->LUMO (28%)<br>HOMO-1->LUMO+1 (15%)<br>HOMO->LUMO+2 (15%)<br>HOMO-2->LUMO+1 (12%)<br>HOMO-3->LUMO (7%)<br>HOMO-1->LUMO+2 (6%)<br>HOMO-1->LUMO+1 (5%)                                                                                                                                    |
| 645.4 | 0.0002 | HOMO-2->LUMO (27%)<br>HOMO-1->LUMO+1 (22%)<br>HOMO-4->LUMO (7%)<br>HOMO-5->LUMO (7%)<br>HOMO-5->LUMO+1 (4%)<br>HOMO-6->LUMO (4%)<br>HOMO-7->LUMO (3%)<br>HOMO-6->LUMO+1 (3%)<br>HOMO-1->LUMO+2 (3%)<br>HOMO-2->LUMO+1 (2%)<br>HOMO-4->LUMO+1 (2%)<br>HOMO-3->LUMO (2%)<br>HOMO-3->LUMO+1 (2%)<br>HOMO->LUMO+1 (2%)<br>HOMO-1->LUMO+1 (29%)<br>HOMO-5->LUMO (19%)<br>HOMO-2->LUMO+1 (11%)<br>HOMO-4->LUMO (8%)<br>HOMO->LUMO+2 (5%) |
| 620.5 | 0.0037 | HOMO-5->LUMO+1 (5%)<br>HOMO-1->LUMO+1 (2%)<br>HOMO-3->LUMO+1 (2%)<br>HOMO-2->LUMO+1 (2%)<br>HOMO->LUMO+1 (2%)                                                                                                                                                                                                                                                                                                                      |
| 610.8 | 0.0115 | HOMO-6->LUMO (14%)<br>HOMO->LUMO+2 (12%)<br>HOMO-3->LUMO+1 (10%)<br>HOMO-1->LUMO+1 (8%)<br>HOMO-1->LUMO+1 (8%)<br>HOMO->LUMO+3 (5%)<br>HOMO-5->LUMO (5%)<br>HOMO-2->LUMO (5%)<br>HOMO-3->LUMO (4%)<br>HOMO-1->LUMO+2 (4%)<br>HOMO->LUMO+2 (4%)<br>HOMO-3->LUMO (4%)<br>HOMO-6->LUMO (3%)<br>HOMO-1->LUMO+2 (3%)                                                                                                                    |
| 605.8 | 0.006  | HOMO-3->LUMO (55%)<br>HOMO->LUMO+2 (26%)                                                                                                                                                                                                                                                                                                                                                                                           |

---

---

|       |        |                                                                                                                                                                                                                                                                                                                                                                                   |
|-------|--------|-----------------------------------------------------------------------------------------------------------------------------------------------------------------------------------------------------------------------------------------------------------------------------------------------------------------------------------------------------------------------------------|
|       |        | HOMO-2->LUMO (5%)                                                                                                                                                                                                                                                                                                                                                                 |
| 601.8 | 0.0019 | HOMO->LUMO+2 (51%)<br>HOMO-3->LUMO (25%)<br>HOMO-6->LUMO (6%)<br>HOMO-6->LUMO (3%)<br>HOMO-7->LUMO (2%)<br>HOMO-1->LUMO+3 (2%)<br>HOMO-1->LUMO+2 (40%)<br>HOMO-2->LUMO+1 (34%)                                                                                                                                                                                                    |
| 593.9 | 0.0016 | HOMO-5->LUMO (8%)<br>HOMO-6->LUMO (4%)<br>HOMO-3->LUMO+1 (2%)                                                                                                                                                                                                                                                                                                                     |
| 572.2 | 0.0037 | HOMO-4->LUMO+1 (22%)<br>HOMO-3->LUMO+2 (22%)<br>HOMO-8->LUMO (10%)<br>HOMO-4->LUMO (9%)<br>HOMO-3->LUMO+1 (8%)<br>HOMO-7->LUMO (5%)<br>HOMO-7->LUMO (3%)<br>HOMO-9->LUMO (2%)<br>HOMO-2->LUMO+1 (2%)<br>HOMO-4->LUMO (40%)<br>HOMO-4->LUMO+1 (14%)<br>HOMO-3->LUMO+2 (9%)<br>HOMO-1->LUMO+2 (6%)<br>HOMO-2->LUMO+1 (3%)                                                           |
| 566.1 | 0.012  | HOMO->LUMO+3 (3%)<br>HOMO-5->LUMO (3%)<br>HOMO-4->LUMO (2%)<br>HOMO->LUMO+2 (2%)<br>HOMO-5->LUMO+1 (2%)                                                                                                                                                                                                                                                                           |
| 558.9 | 0.0148 | HOMO-4->LUMO (19%)<br>HOMO-7->LUMO (18%)<br>HOMO-6->LUMO (10%)<br>HOMO-1->LUMO+2 (7%)<br>HOMO-8->LUMO (4%)<br>HOMO-8->LUMO (4%)<br>HOMO-9->LUMO (3%)<br>HOMO-4->LUMO (3%)<br>HOMO-4->LUMO+1 (3%)<br>HOMO-5->LUMO+1 (3%)<br>HOMO-3->LUMO (3%)<br>HOMO->LUMO+2 (2%)<br>HOMO->LUMO+2 (2%)<br>HOMO->LUMO+3 (2%)<br>HOMO-2->LUMO+1 (19%)<br>HOMO-8->LUMO (13%)<br>HOMO-1->LUMO+2 (12%) |
| 552.7 | 0.0011 | HOMO-6->LUMO (9%)<br>HOMO->LUMO+3 (8%)<br>HOMO-7->LUMO (4%)<br>HOMO-8->LUMO (3%)<br>HOMO-4->LUMO+1 (3%)                                                                                                                                                                                                                                                                           |

---

HOMO-5->LUMO (3%)  
HOMO-3->LUMO+2 (3%)  
HOMO-6->LUMO (2%)

---

**Table S5.** TD-DFT spectra of metal complexes in different spin states calculated at B3LYP functional with three different basis set: CEP-31G, CEP-121G and def2TZV at gaseous state.

|                                  | $\lambda_1$ | $\lambda_2$ | $\lambda_3$ | $\lambda_4$ |
|----------------------------------|-------------|-------------|-------------|-------------|
| Au-TMPN <sub>amine-</sub> corner | 502         | 589         | 740         | 989         |
| Au-TMPN <sub>amine-</sub> center | 552         | 726         | 1190        |             |
